# Supplementary material
Source: bioRxiv or medRxiv preprint supplement (https://medrxiv.org/highwire/filestream/95173/field_highwire_adjunct_files/0/2020.08.31.20185082-1.pdf)
Supplement: Supplementary file [file 2020.08.31.20185082-1.pdf]

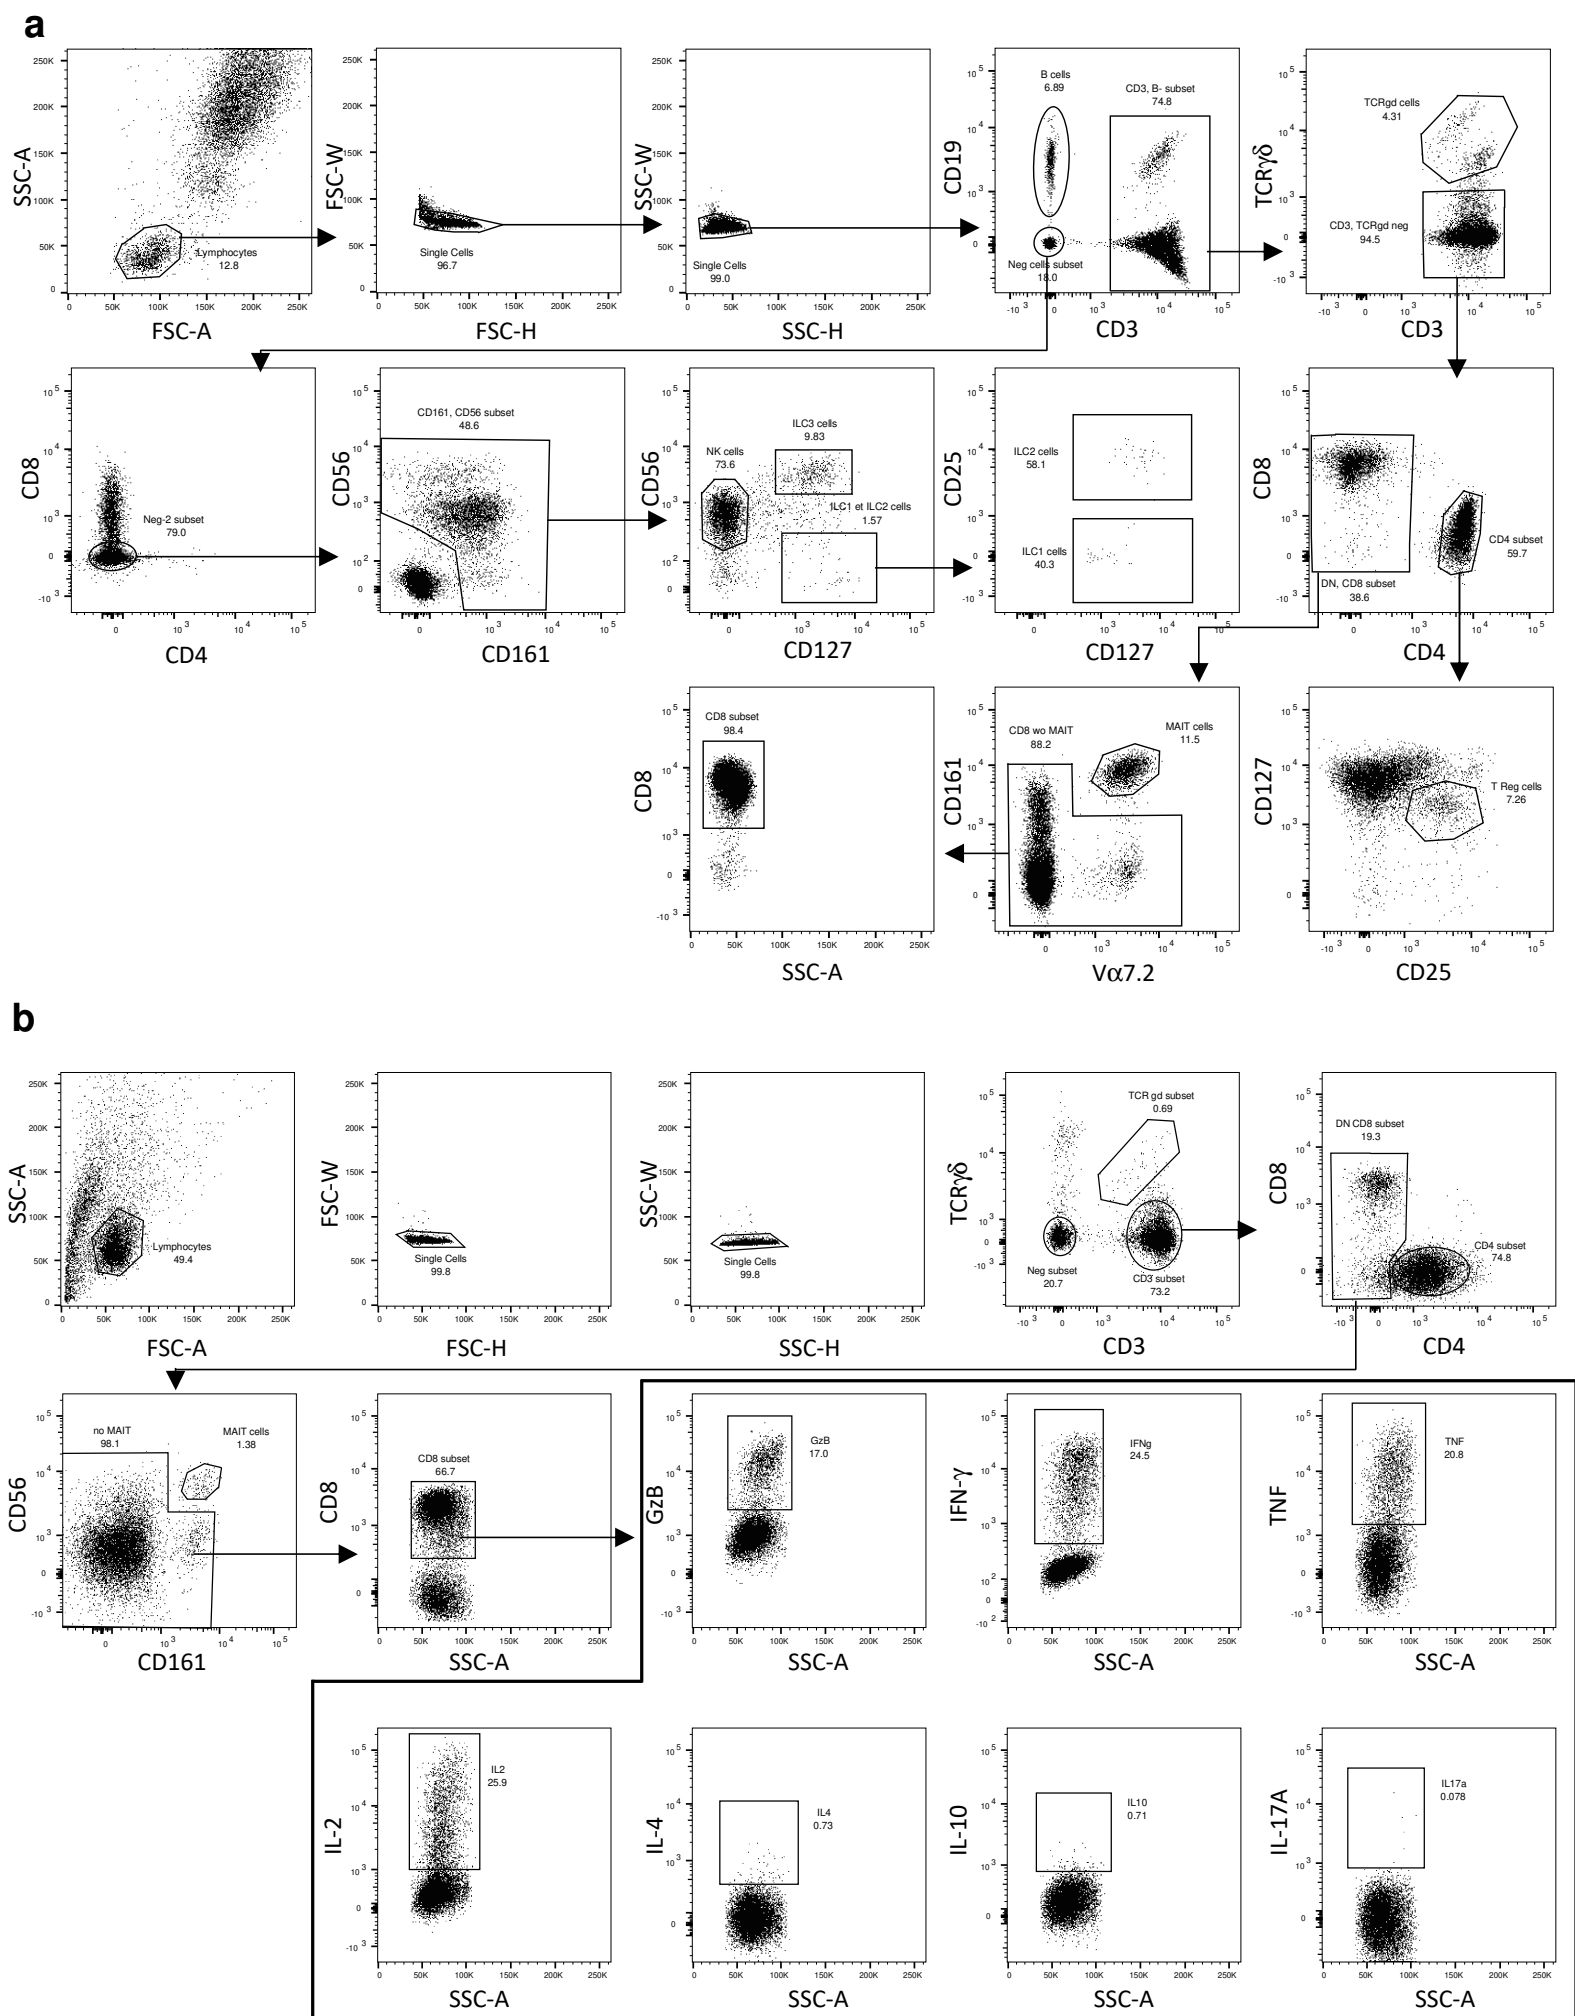

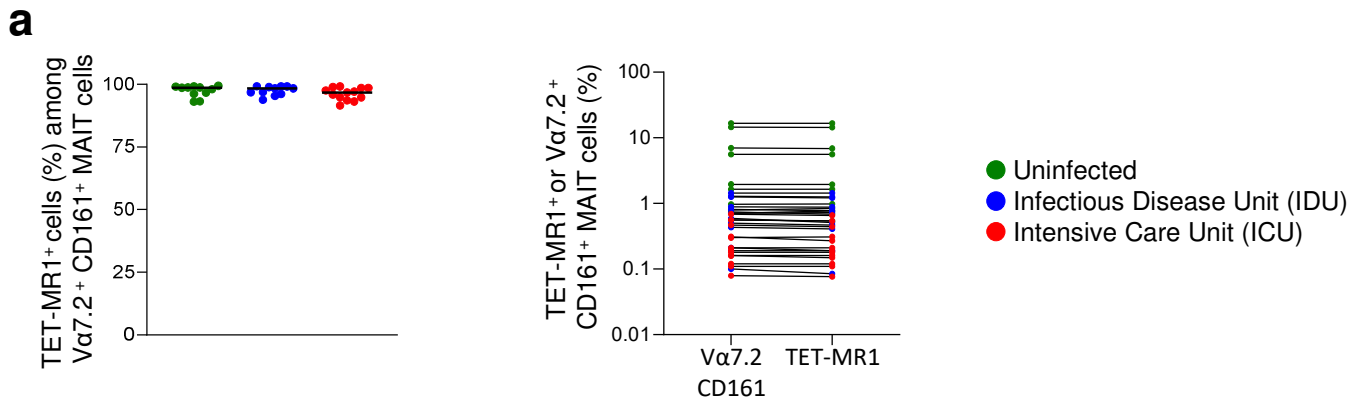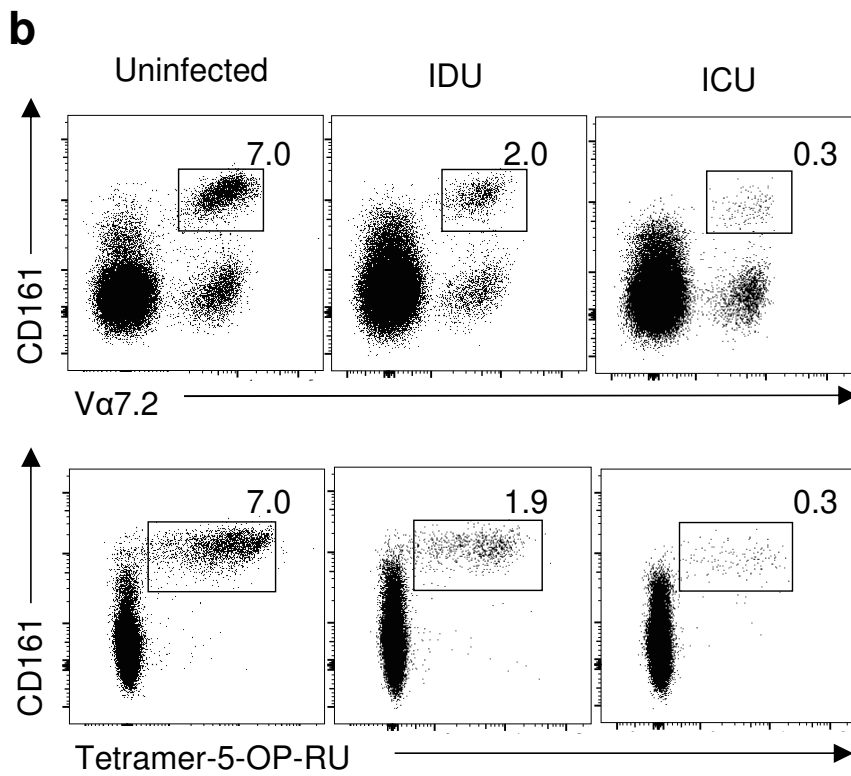

**Supplementary Fig. 2: MAIT cells co-staining with MR1-Tetramer and Va7.2<sup>+</sup> CD161<sup>+</sup>.**

(a) Flow cytometry analysis of 5-(2-oxopropylideneamino)-6-D-ribitylaminouracil (5-OP-RU)-loaded MR1 tetramer binding among Va7.2<sup>+</sup> CD161<sup>+</sup> MAIT cells in uninfected patients (n=11) and SARS-CoV-2 infected patients from Infectious Disease Unit (IDU) (n=11) and Intensive Care Unit (ICU) (n=13). (b) Dot plot representative of MR1-Tetramer<sup>+</sup> CD161<sup>+</sup> MAIT cells in one uninfected control and one COVID-19 patient from IDU and one from ICU.

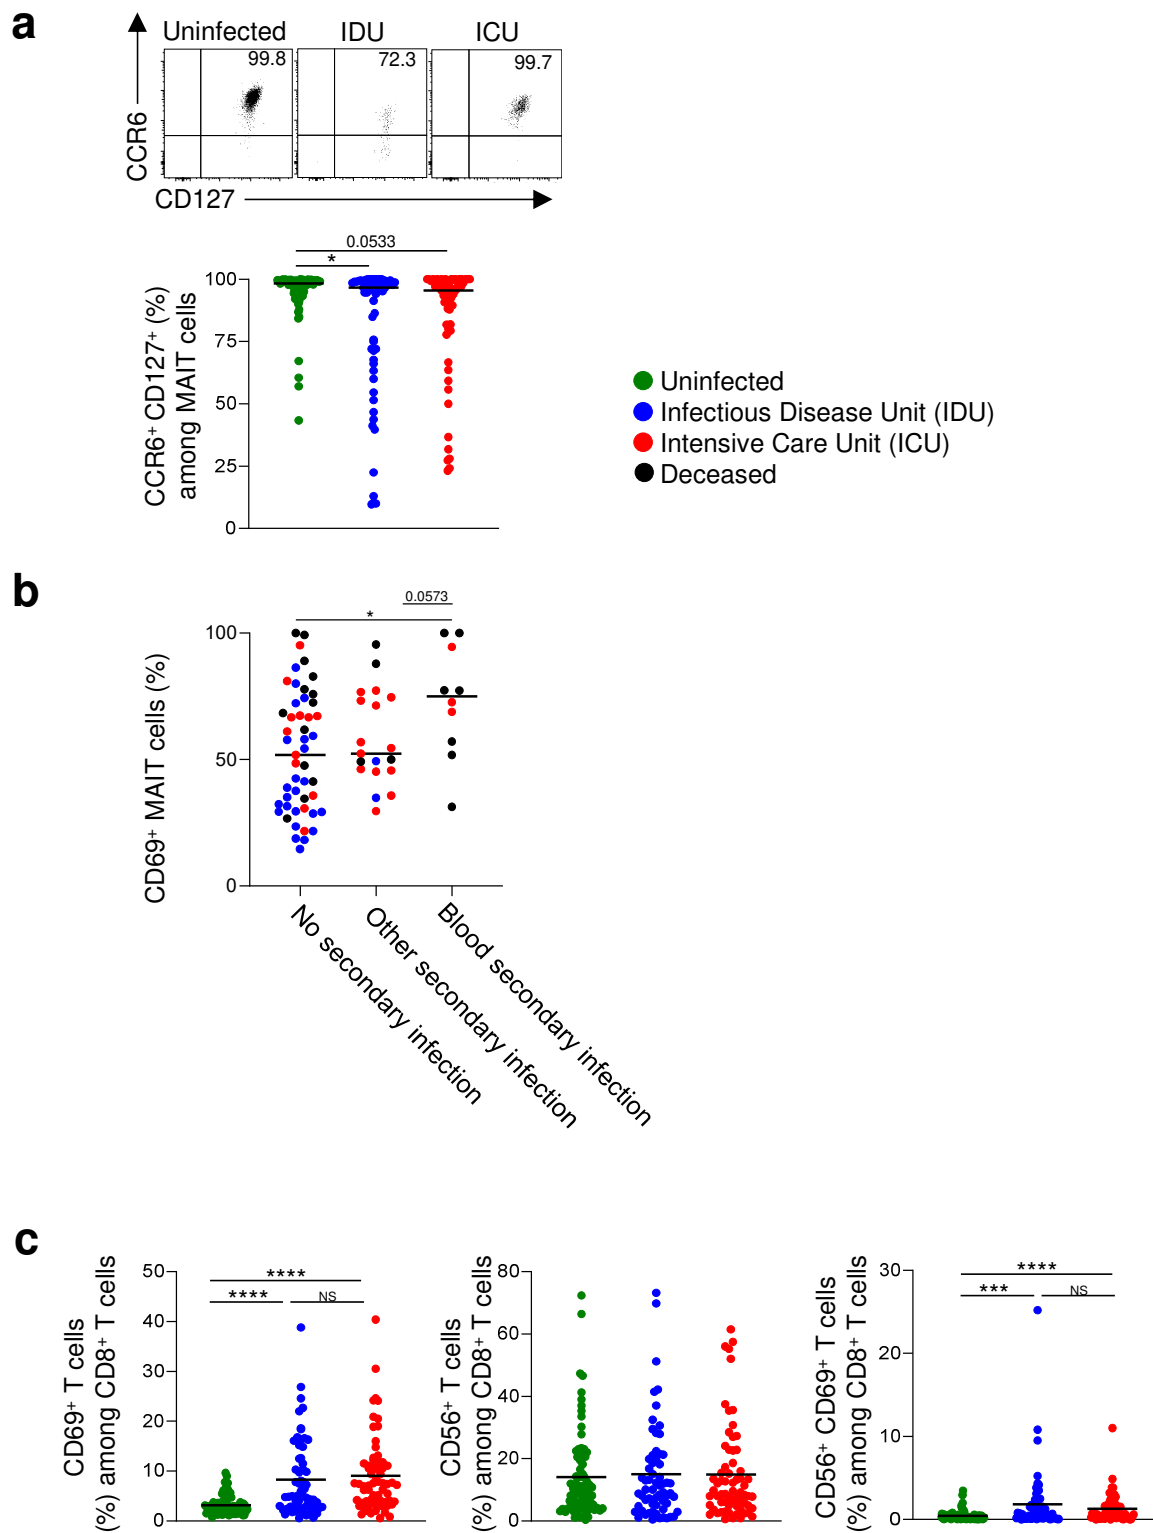

**Supplementary Fig. 3: MAIT and CD8 surface marker expression.** (a) Representative dot plot and frequency of CCR6<sup>+</sup> CD127<sup>+</sup> MAIT cells in uninfected controls (n=80), IDU (n=62), and ICU (n=66) with SARS-CoV-2 infection. (b) Frequency of CD69<sup>+</sup> MAIT cells in COVID-19 would did not contract any secondary infection (n=49), those who develop secondary infection outside blood circulation (e.g Hospital acquired pneumonia, urine infections) (n=19) and inside blood circulation (e.g blood bacteriemia, septic shock) (n=10). (c) Flow cytometry analysis of CD69<sup>+</sup>, CD56<sup>+</sup>, and CD56<sup>+</sup> CD69<sup>+</sup> CD8<sup>+</sup> cells in uninfected controls (n=80), IDU (n=62), and ICU (n=66) with SARS-CoV-2 infection. Each symbol represents a single biological sample. \*P<0.05, \*\*P<0.01, \*\*\*P<0.001, and \*\*\*\*P<0.0001 (two-sided Mann-Whitney nonparametric test).

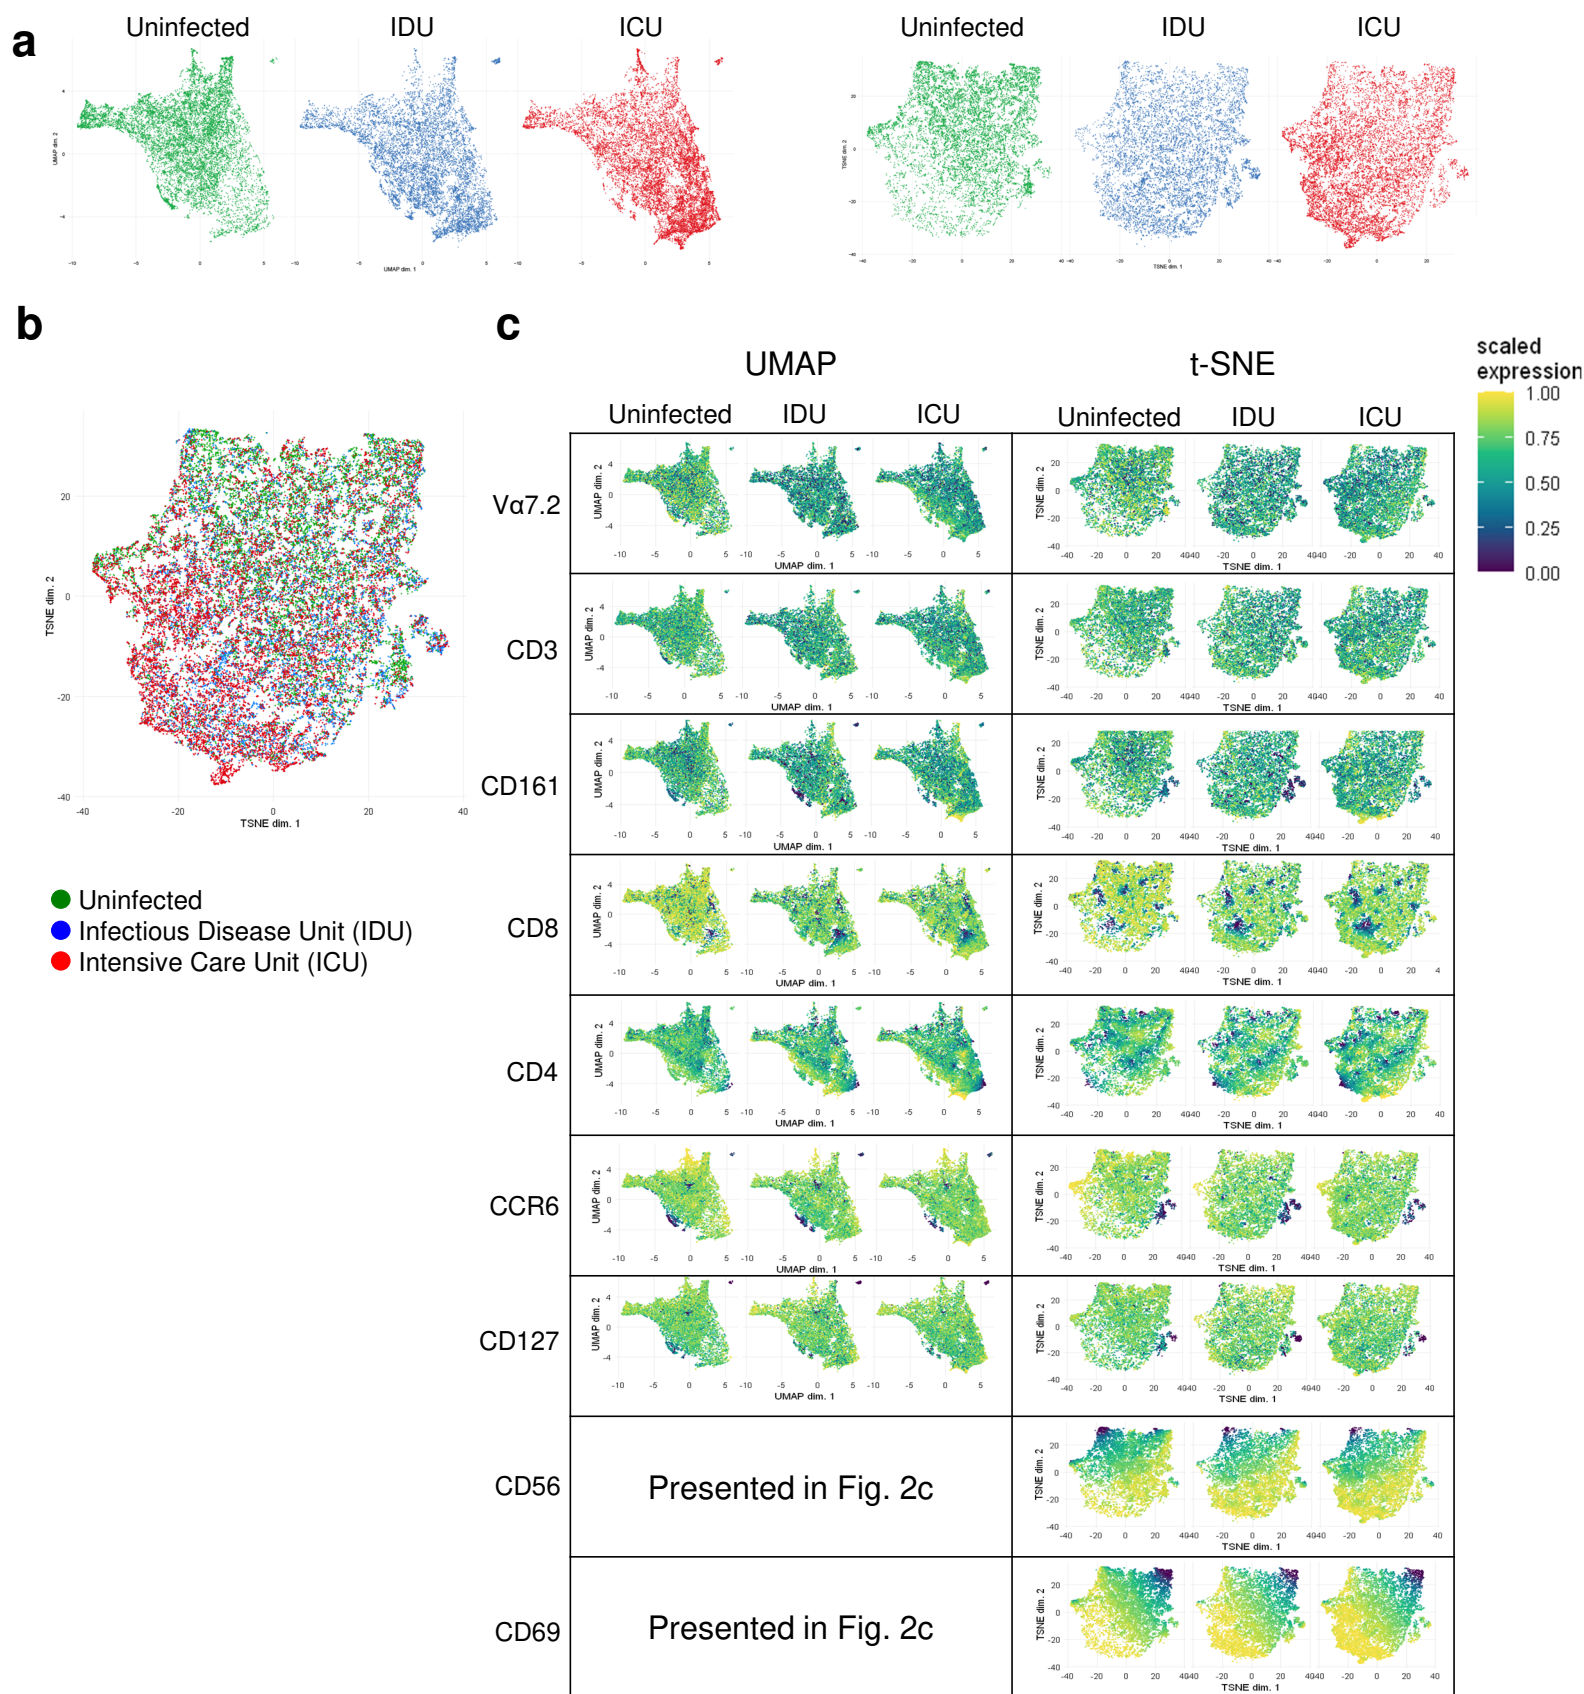

**Supplementary Fig. 4: Details of MAIT cell unsupervised analyses in COVID-19 Patients.** Dimensionality reduction techniques including Uniform manifold approximation and projection (UMAP) and T-distributed Stochastic Neighbor Embedding (t-SNE) from uninfected, and infected patients presented in Fig. 2b,c. **(a)** UMAP and tSNE representation of MAIT cells from COVID-19 patients and non-infected controls separately. **(b)** t-SNE of MAIT cells from COVID-19 patients and uninfected controls. **(c)** UMAP and tSNE colored by the scaled expression of Va7.2, CD3, CD161, CD8, CD4, CCR6, CD127, CD56, and CD69 specific markers in uninfected (n=23), IDU (n=50), and ICU patients (n=66).

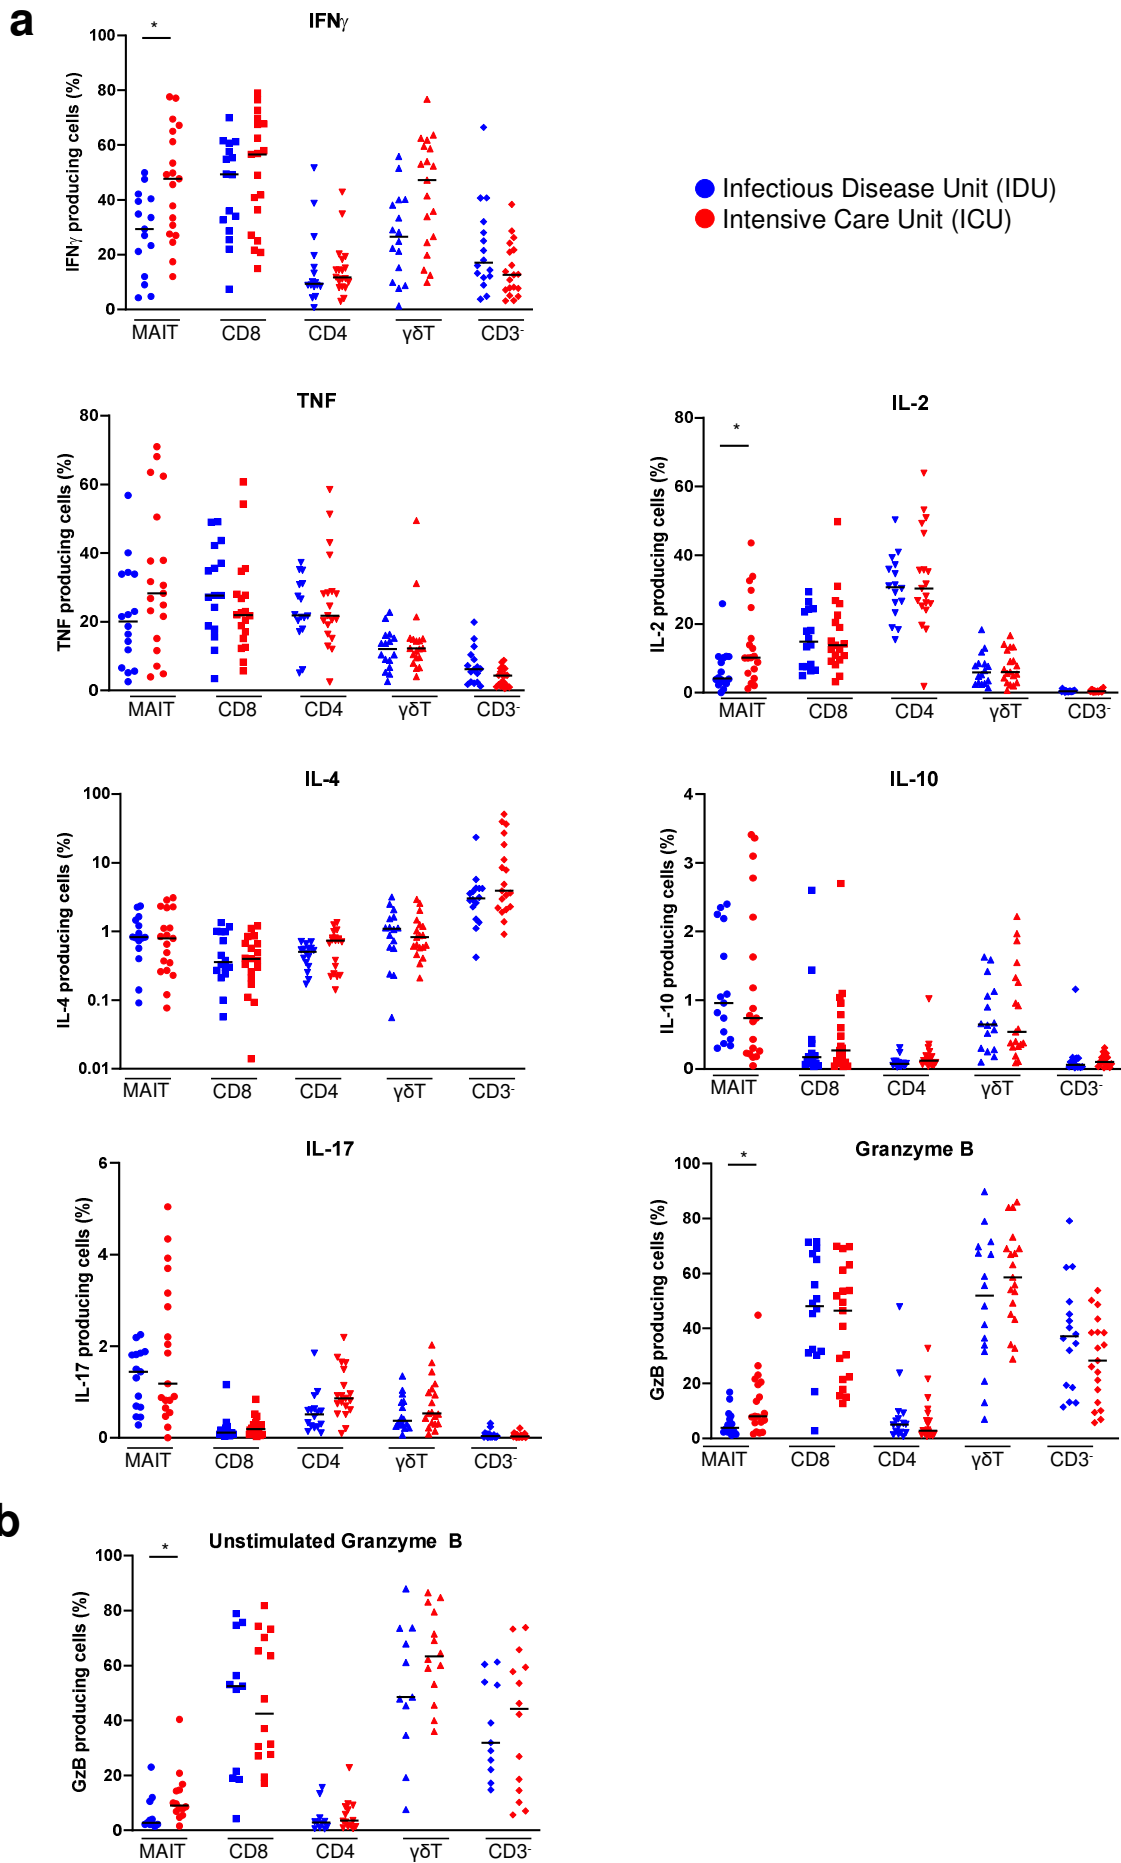

**Supplementary Fig. 5: MAIT cell function alterations scale with COVID-19 severity.** (a) Flow cytometry analysis of IFN $\gamma$ , TNF, IL-2, IL-4, IL-10, IL-17 cytokine, and granzyme B production among stimulated MAIT cells, conventional CD8<sup>+</sup> and CD4<sup>+</sup> T cells,  $\gamma\delta$ T and CD3<sup>-</sup> cells from IDU (n=15-16) or ICU COVID-19 patients (n=19). (b) Flow cytometry analysis of GzB without stimulation from IDU (n=11) or ICU COVID-19 patients (n=14). Each symbol represents a single biological sample. \*P<0.05 and \*\*P<0.01 (two-sided Mann-Whitney nonparametric test).

**a**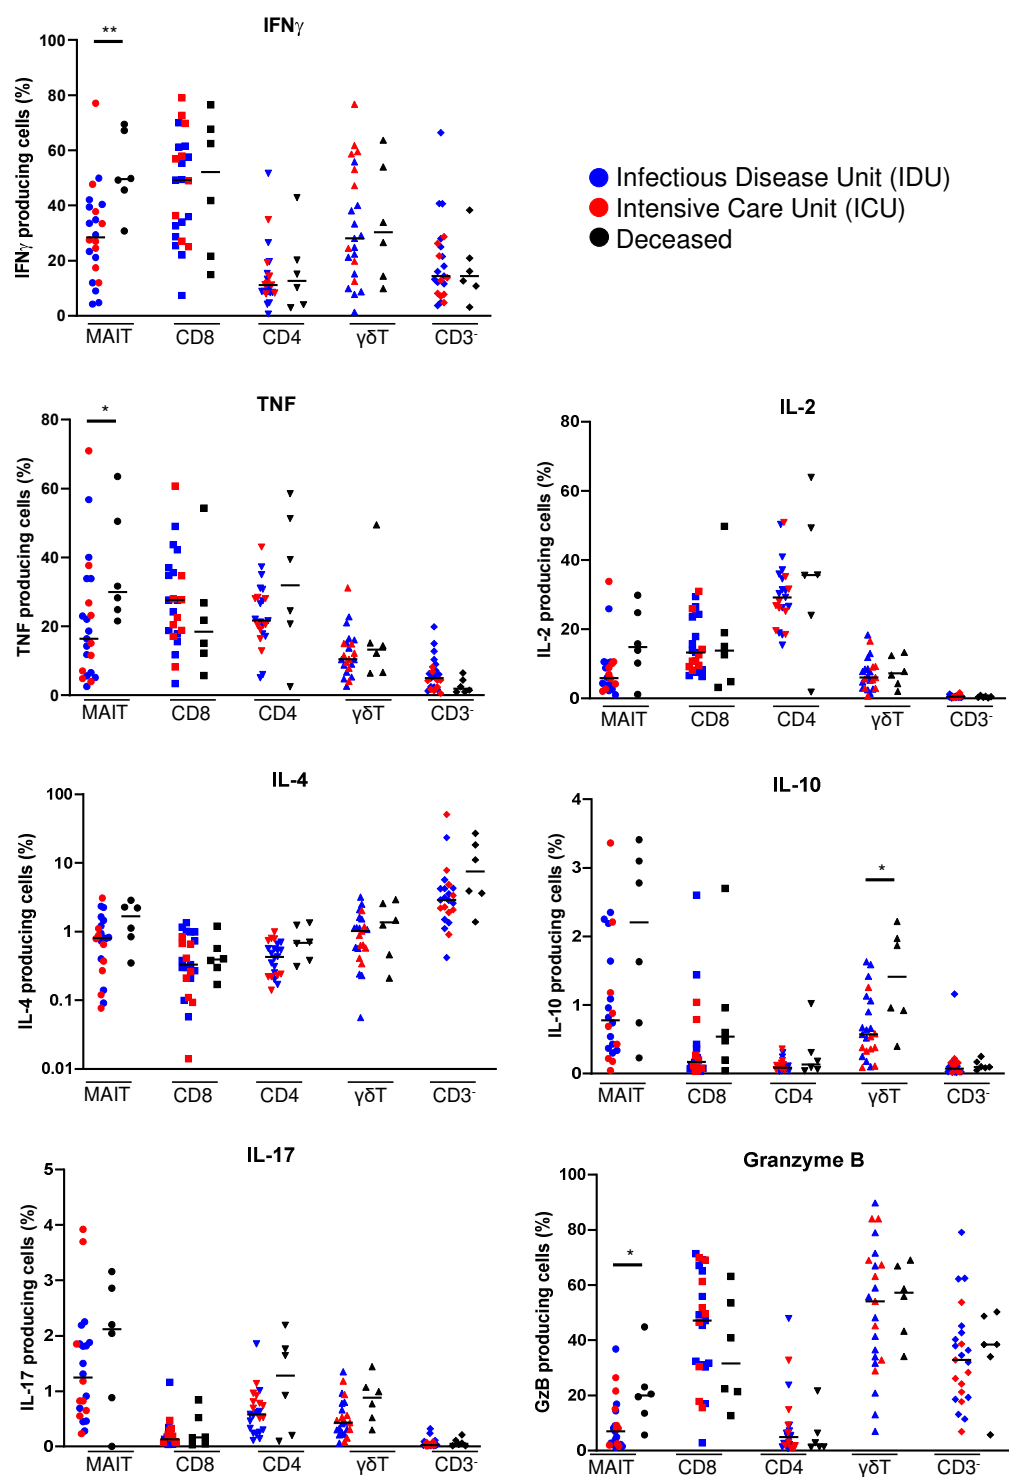**b**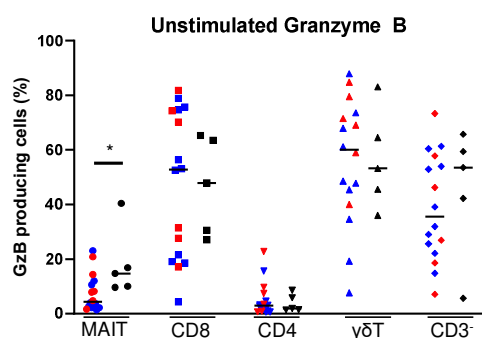

**Supplementary Fig. 6: MAIT cell functions are impacted in fatal SARS-CoV-2 infection. (a-b)** Flow cytometry analysis of IFN $\gamma$ , TNF, IL-2, IL-4, IL-10, IL-17 cytokines, and granzyme B production among stimulated MAIT cells, conventional CD8<sup>+</sup> and CD4<sup>+</sup> T cells,  $\gamma\delta$ T and CD3<sup>-</sup> cells in non-fatal (n=22-23) versus fatal COVID-19 patients (n=6). Flow cytometry analysis of granzyme B among unstimulated MAIT cells, conventional CD8<sup>+</sup> and CD4<sup>+</sup> T cells,  $\gamma\delta$ T and CD3<sup>-</sup> cells in non-fatal (n=16) versus fatal COVID-19 patients (n=5-6). Each symbol represents a single patient. \*P<0.05 and \*\*P<0.01 (two-sided Mann-Whitney nonparametric test).

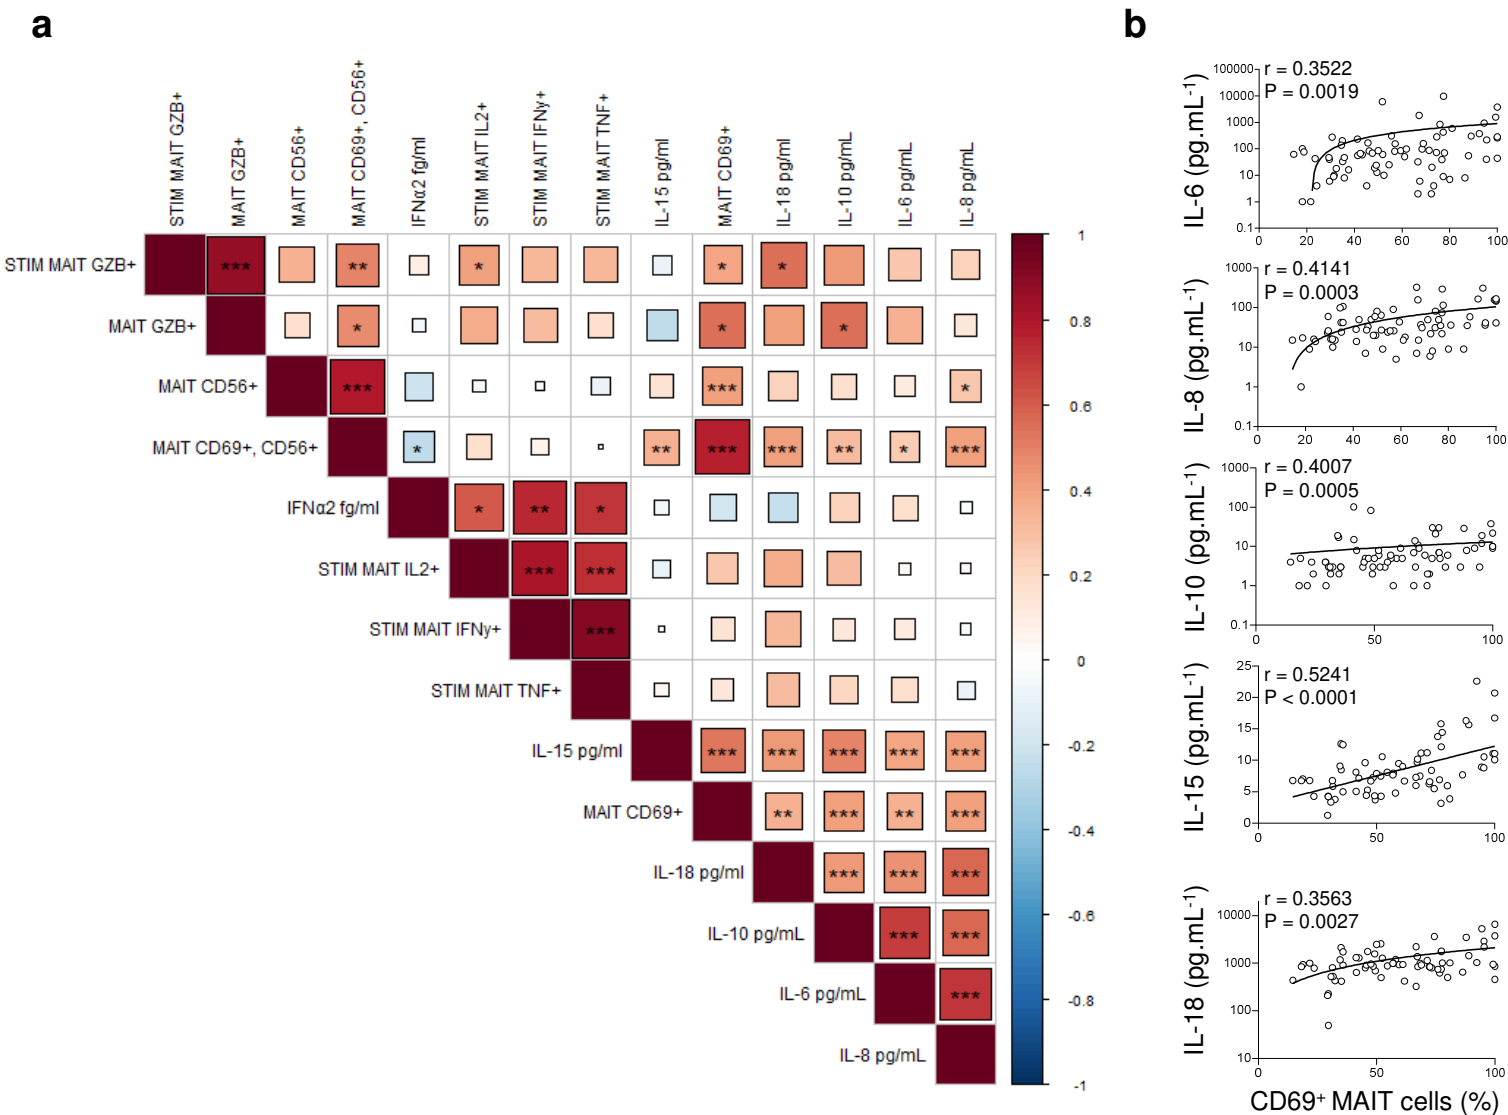

**Supplementary Fig. 7: Pro-inflammatory cytokines blood levels are correlated with MAIT cell activation and cytokine secretion.** (a) Multiparametric matrix correlation plot of plasmatic cytokine concentration, surface marker, and intracytoplasmic MAIT cells staining. Spearman's correlation coefficients are visualized by square size and color intensity. Variables are ordered by hierarchical clustering. (b) Correlation between various combinations (axes) of plasmatic cytokine levels (IL-6, IL-8, IL-10, IL-15, IL-18) and the frequency of CD69<sup>+</sup> MAIT cells in patient's blood (presented as a % value of total MAIT cells) (n=69-93). Each symbol represents one single patient. \* $P < 0.05$ , \*\* $P < 0.01$ , and \*\*\* $P < 0.001$  (Spearman nonparametric correlation test corrected for multiple inferences using Holm's method).

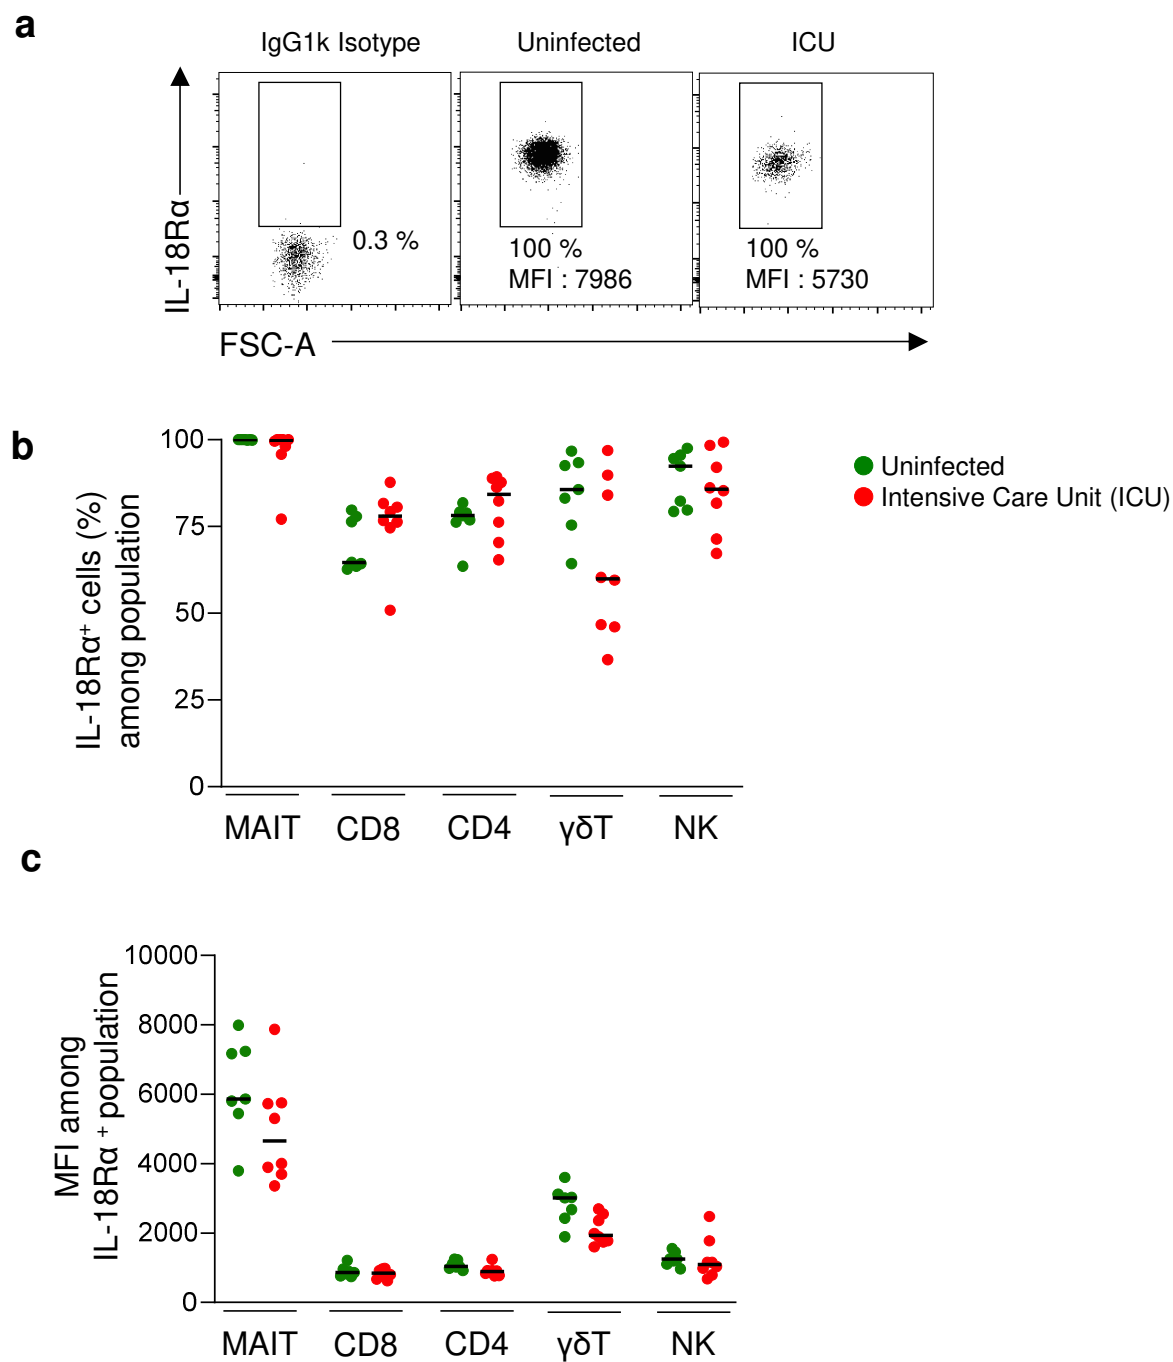

**Supplementary Fig. 8: IL-18 receptor is highly expressed on MAIT cells.** (a) Representative dot plot of IL-18R $\alpha$  MAIT cells in one uninfected control, and one COVID-19 patient from ICU. IgG1k isotype is displayed as control staining. (b-c) Frequencies (b) and Mean Fluorescence Intensity (MFI) (c) by flow cytometry, of IL-18 receptor among MAIT cells, conventional CD8<sup>+</sup> and CD4<sup>+</sup> T cells,  $\gamma\delta$ T, and NK cells in the blood of uninfected controls (n=7) compared to COVID-19 patients hospitalized in Intensive Care Unit (ICU) (n=8). FSC, Forward scatter. Small horizontal lines indicate the median, each symbol represents one single patient.



Contribution of variables to Dim-1-2

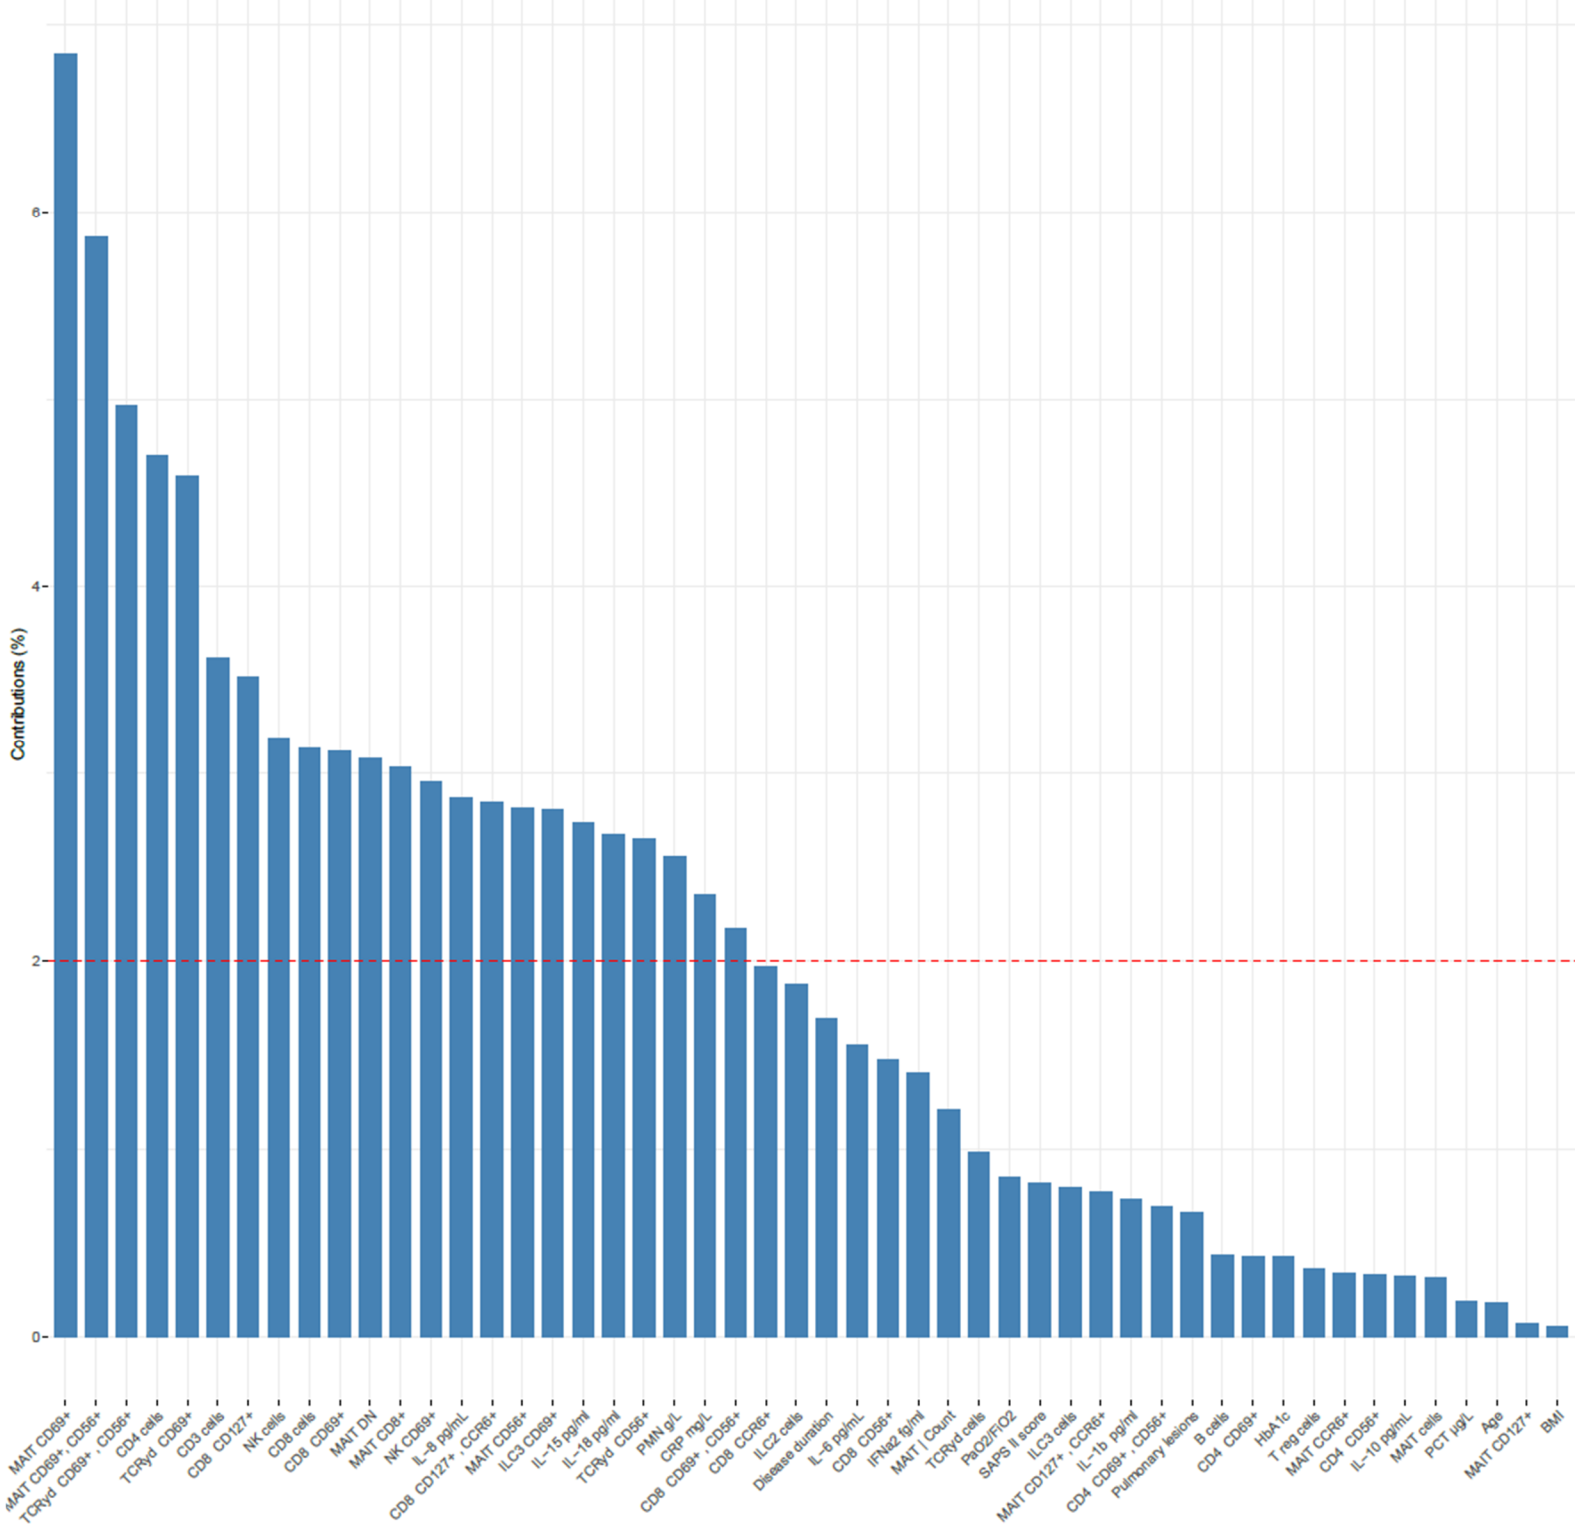

**Supplementary Fig. 9: All contribution parameters in Principal Component Analysis (PCA) of all COVID-19 patients.** Contribution variables used to produce the PCA including non-fatal cases of IDU (n=46), ICU (n=30), and fatal cases from IDU (n=6) and ICU (n=21) SARS-CoV-2 infected patients. Dotted line symbolizes if all variable contributions were identical.

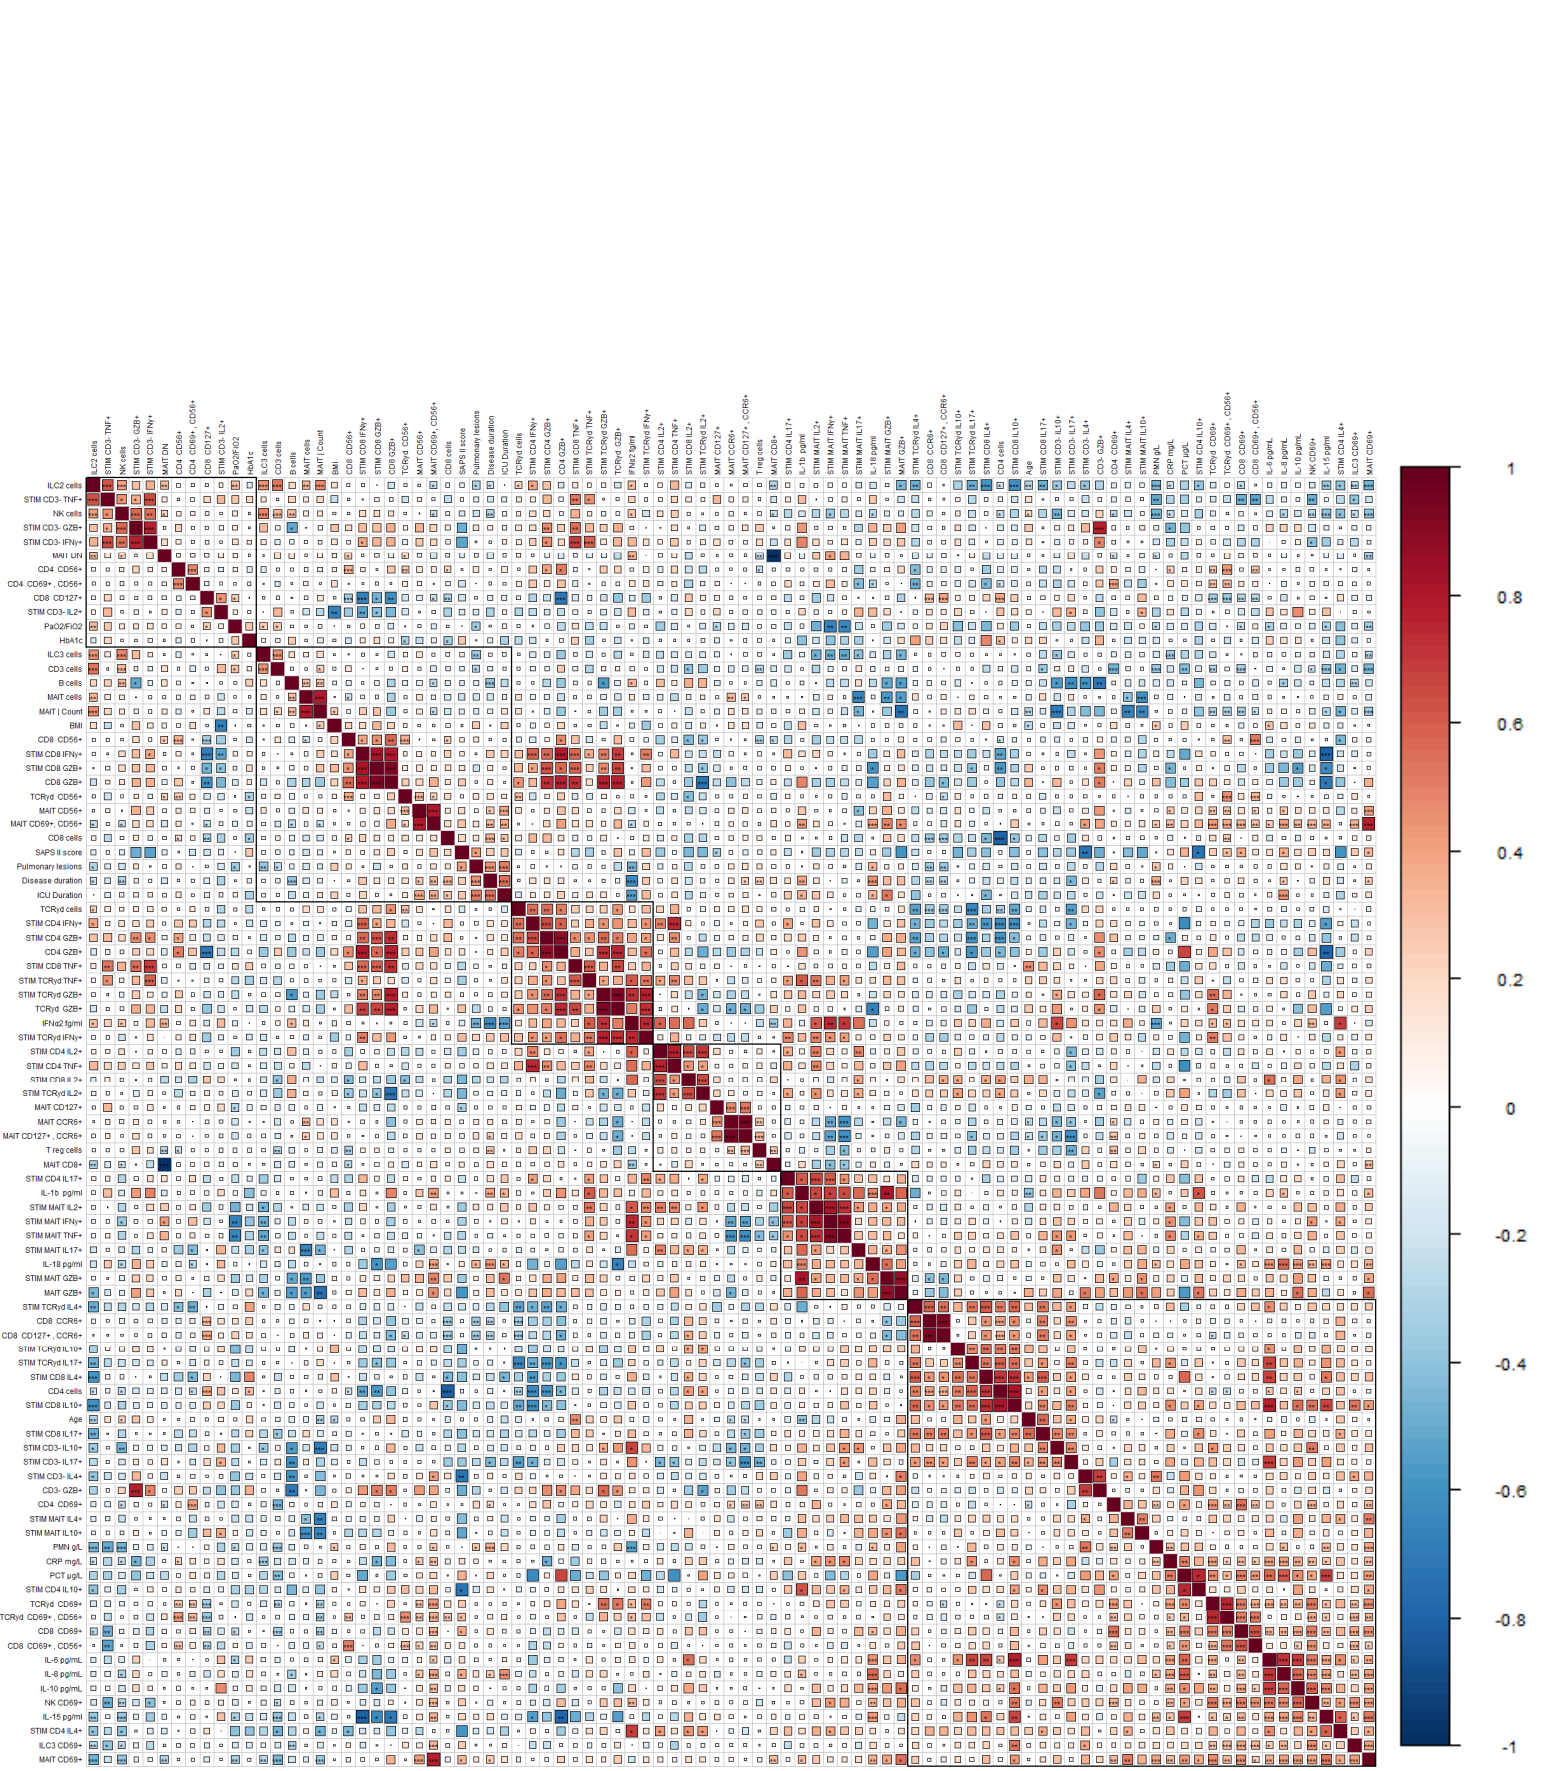

**Supplementary Fig. 10: Correlation plot of all parameters in all COVID-19 patients.** Multiparametric matrix correlation plot of all available clinical data, cytokines plasmatic concentration, immune cells frequency, surface marker, and intracytoplasmic staining in all COVID-19 patients (n= 102). Spearman's correlation coefficients are visualized by square size and color intensity. Variables are ordered by hierarchical clustering. \*P<0.05, \*\*P<0.01, and \*\*\*P<0.001 (Spearman nonparametric correlation test corrected for multiple inferences using Holm's method).
